# Supplementary material for: Dissociation in Psychiatric Disorders: A Meta-Analysis of Studies Using the Dissociative Experiences Scale
Source: Atypon-hosted journal article supplement (doi:10.1176/appi.ajp.2017.17010025), 2017-09-26
Supplement: appi.ajp.2017.17010025.ds001.pdf [file appi.ajp.2017.17010025.ds001.pdf]

## Contents

- **Table S1. Results for DES Subfactors**
  
- **Forest Plots of Each Diagnostic Category**
  - Schizophrenia
  - Bipolar and Related Disorders
  - Depressive Disorders
  - Anxiety Disorders
  - Panic Disorder
  - Obsessive-Compulsive Disorder
  - Posttraumatic Stress Disorder
  - Dissociative Disorders
  - Dissociate Identity Disorder
  - Depersonalization/Derealization Disorder
  - Somatic Symptom Disorder
  - Conversion Disorder
  - Feeding and Eating Disorders
  - Anorexia Nervosa
  - Bulimia Nervosa
  - Alcohol Use Disorder
  - Other Substance-Related Disorders
  - Gambling Disorder
  - Borderline Personality Disorder
  
- **Reference List of Included Studies**

**TABLE S1. Results for DES Subfactors**

| Diagnostic Group                | DES factor                          | k  | N   | m    | 95% CI       | I <sup>2</sup> |
|---------------------------------|-------------------------------------|----|-----|------|--------------|----------------|
| Borderline Personality Disorder | Dissociative Amnesia                | 4  | 486 | 19.5 | [13.0, 25.9] | 91.5 %         |
|                                 | Absorption                          | 4  | 486 | 31.2 | [27.9, 34.6] | 63.9 %         |
|                                 | Depersonalization/<br>Derealization | 4  | 486 | 22.6 | [16.4, 28.8] | 86.9 %         |
| Dissociative Disorders          | Dissociative Amnesia                | 12 | 470 | 13.9 | [10.5, 17.2] | 90.8 %         |
|                                 | Absorption                          | 12 | 470 | 35.0 | [28.2, 41.7] | 93.0 %         |
|                                 | Depersonalization/<br>Derealization | 17 | 768 | 40.8 | [36.4, 45.3] | 90.2 %         |
| Schizophrenia                   | Dissociative Amnesia                | 4  | 281 | 10.4 | [8.1, 12.7]  | 62.4 %         |
|                                 | Absorption                          | 4  | 281 | 22.1 | [18.4, 25.8] | 66.1 %         |
|                                 | Depersonalization/<br>Derealization | 5  | 358 | 16.6 | [13.4, 19.8] | 58.1 %         |

Forest Plots of Each Diagnostic Category

## Schizophrenia

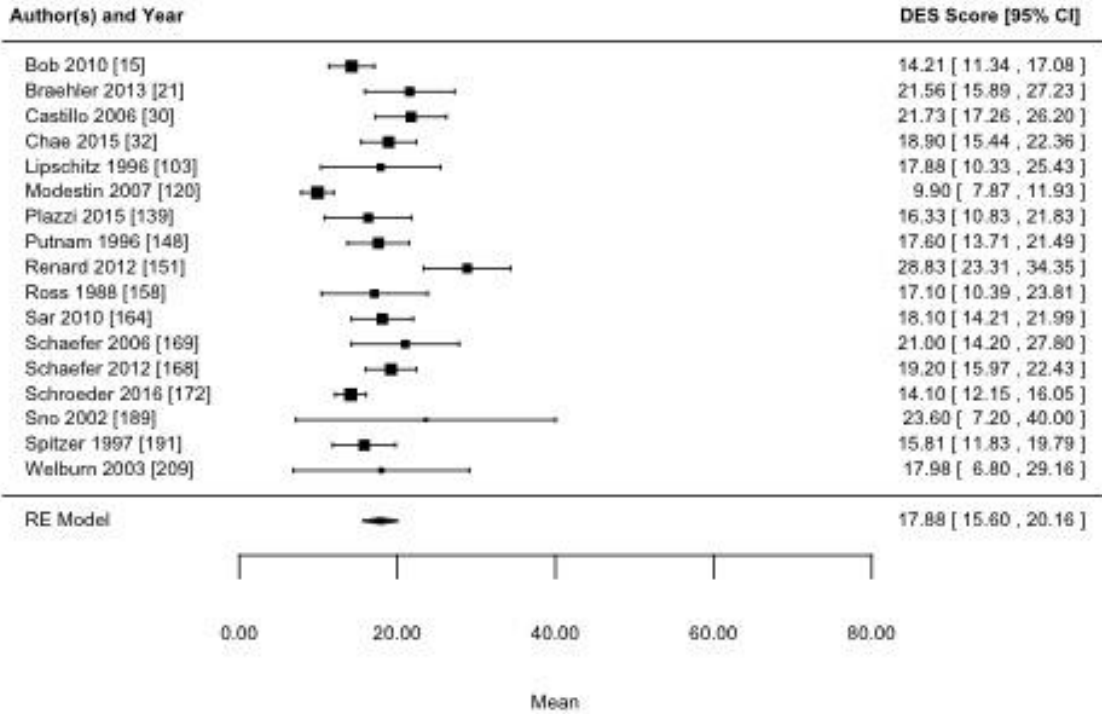

## Bipolar and Related Disorders

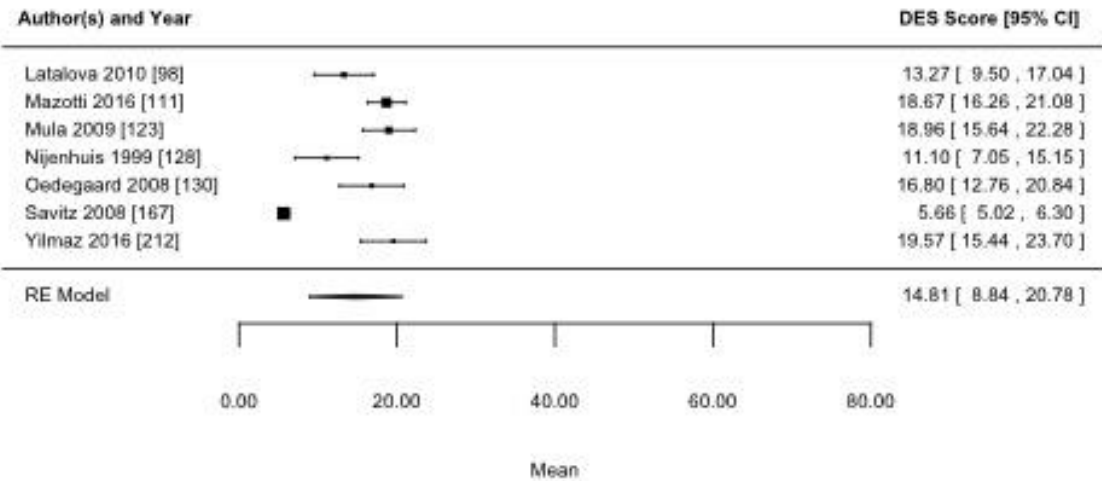

# Depressive Disorders

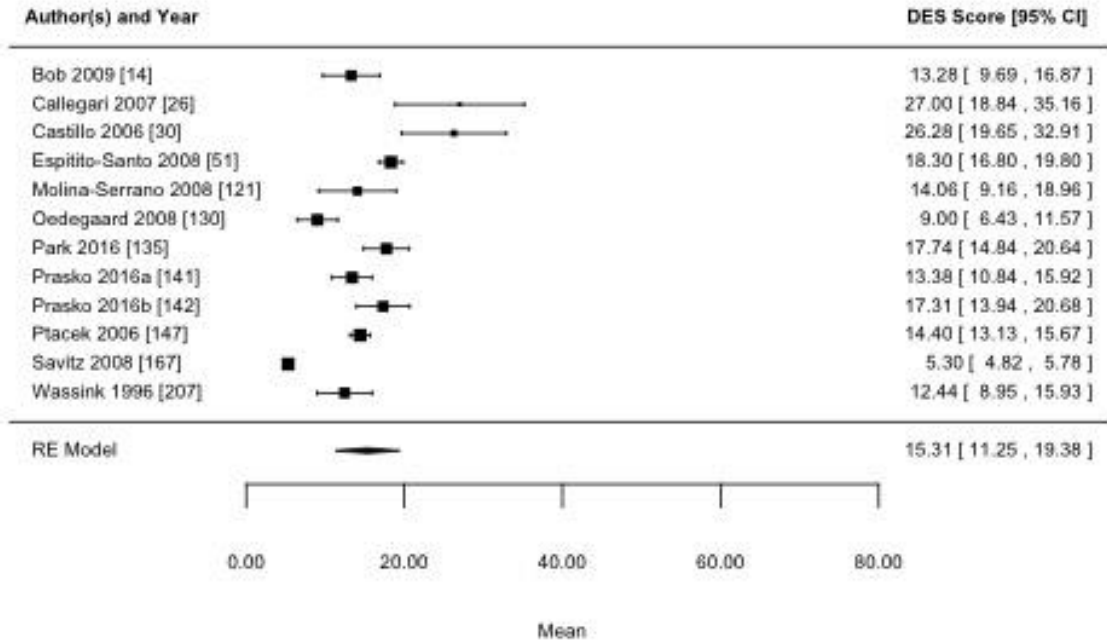

# Anxiety Disorders

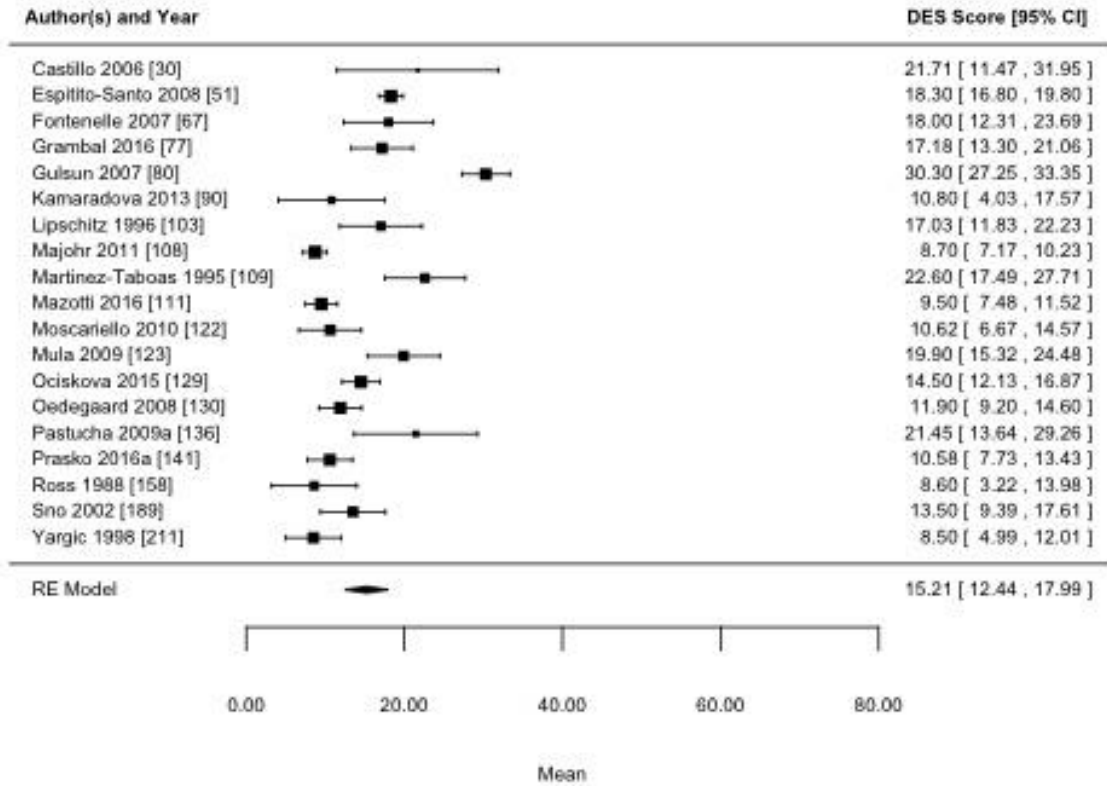

# Panic Disorder

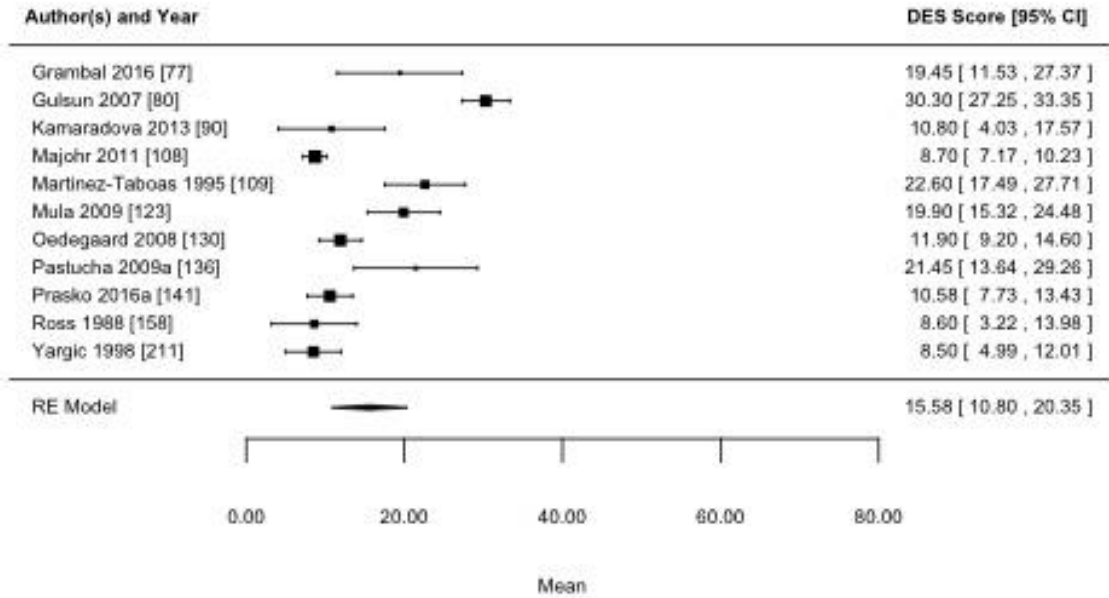

# Obsessive-Compulsive Disorder

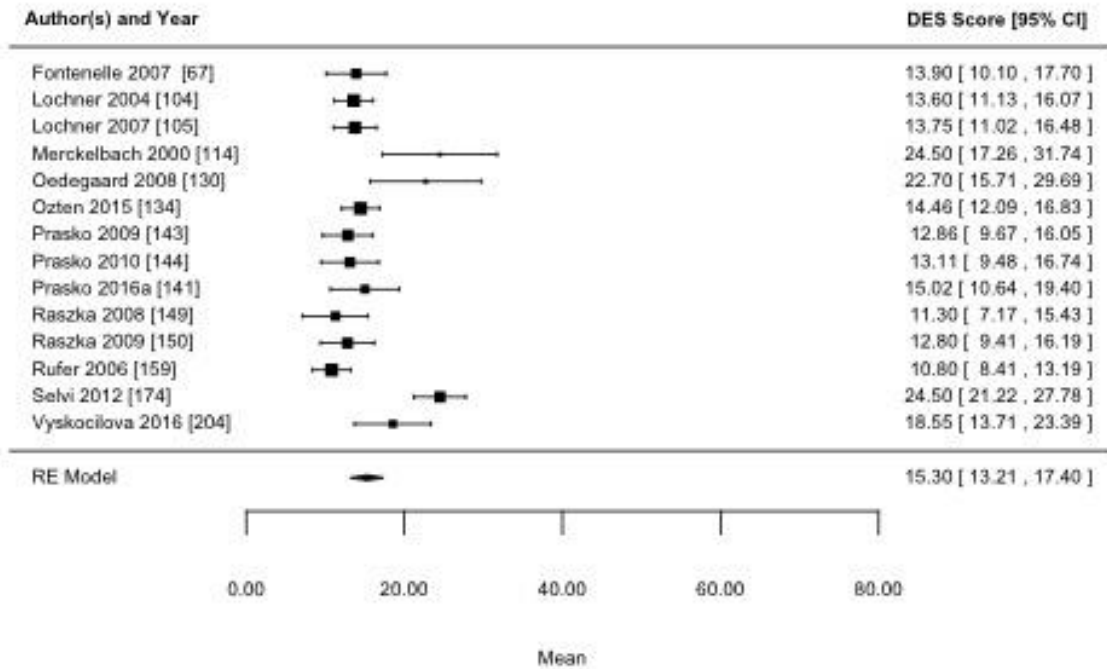

# Posttraumatic Stress Disorder

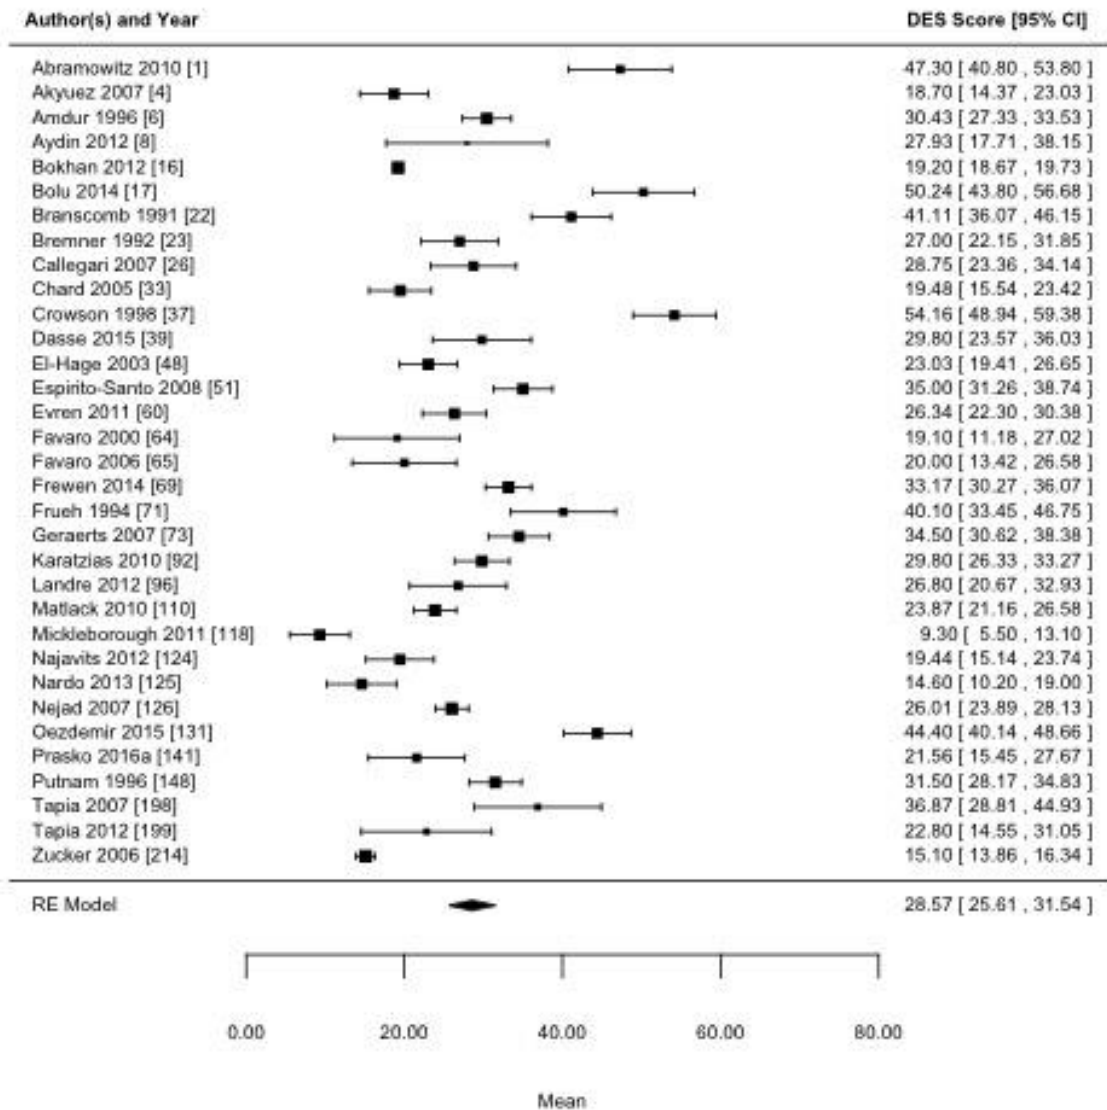



# Dissociative Disorders

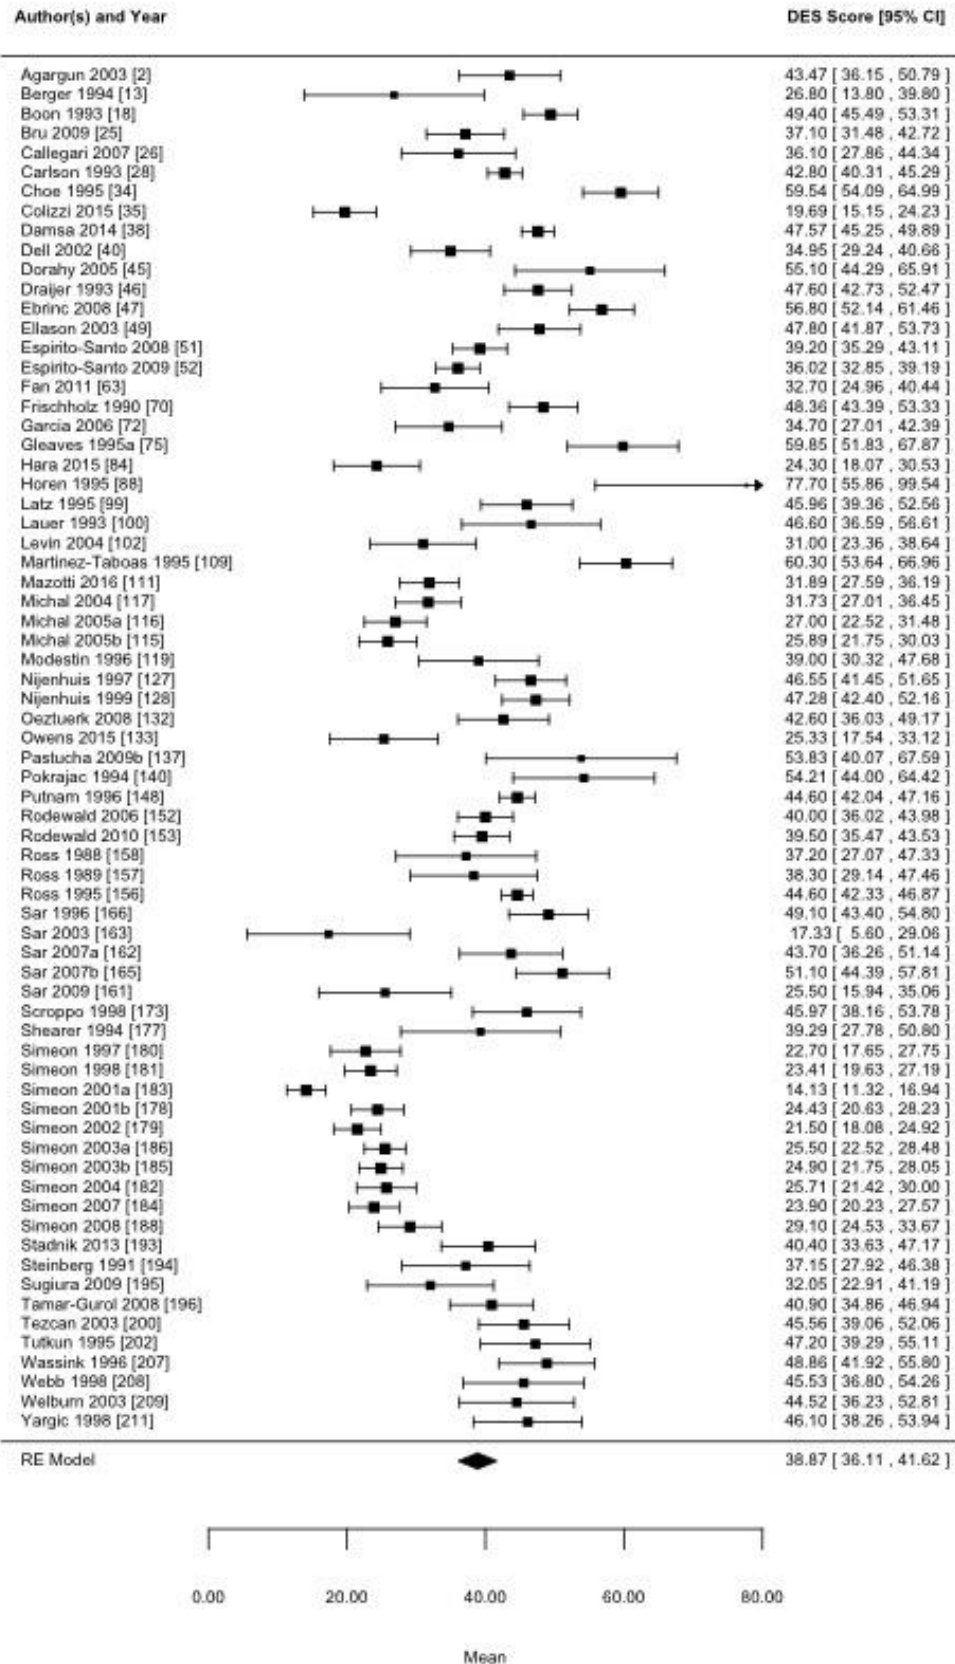

# Dissociative Identity Disorder

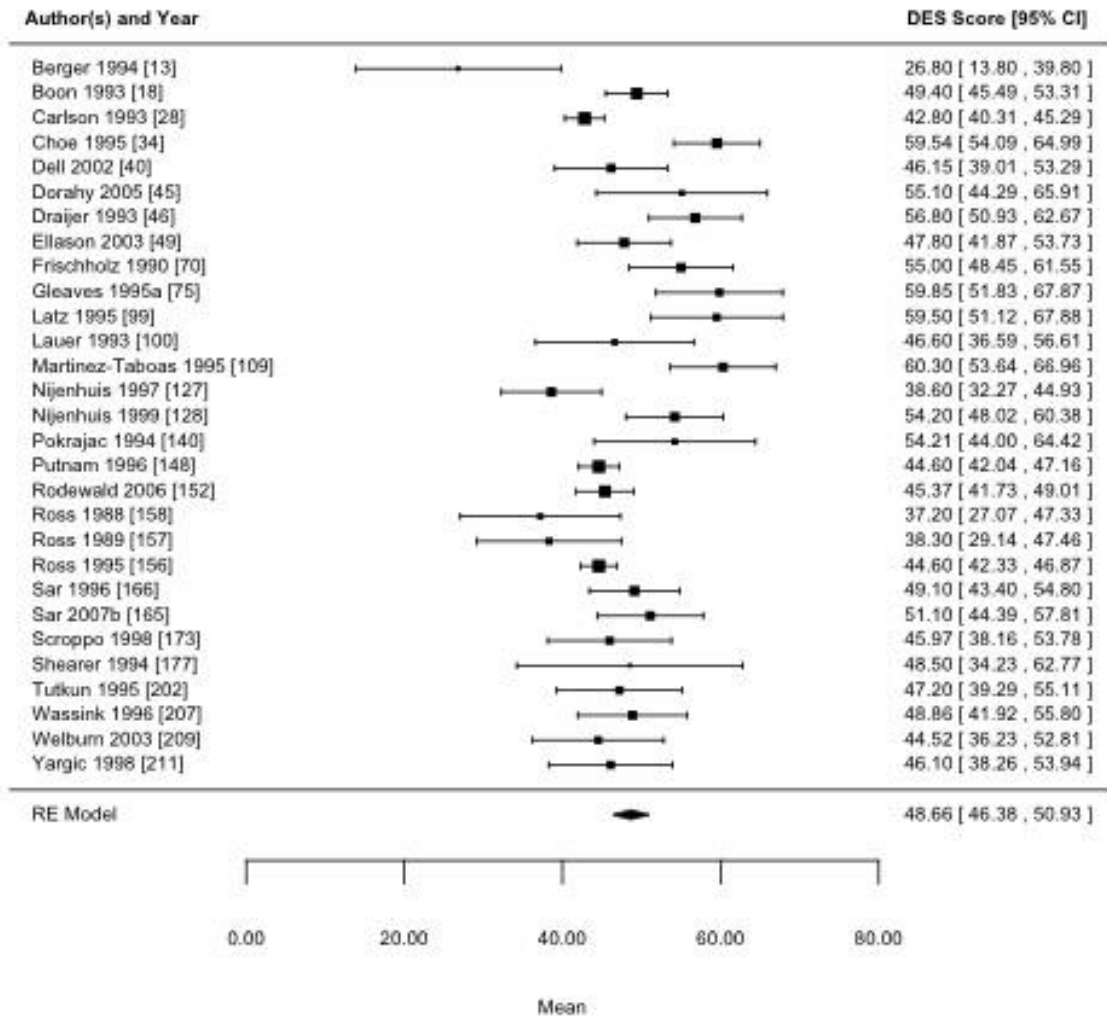

## Depersonalization/Derealization Disorder

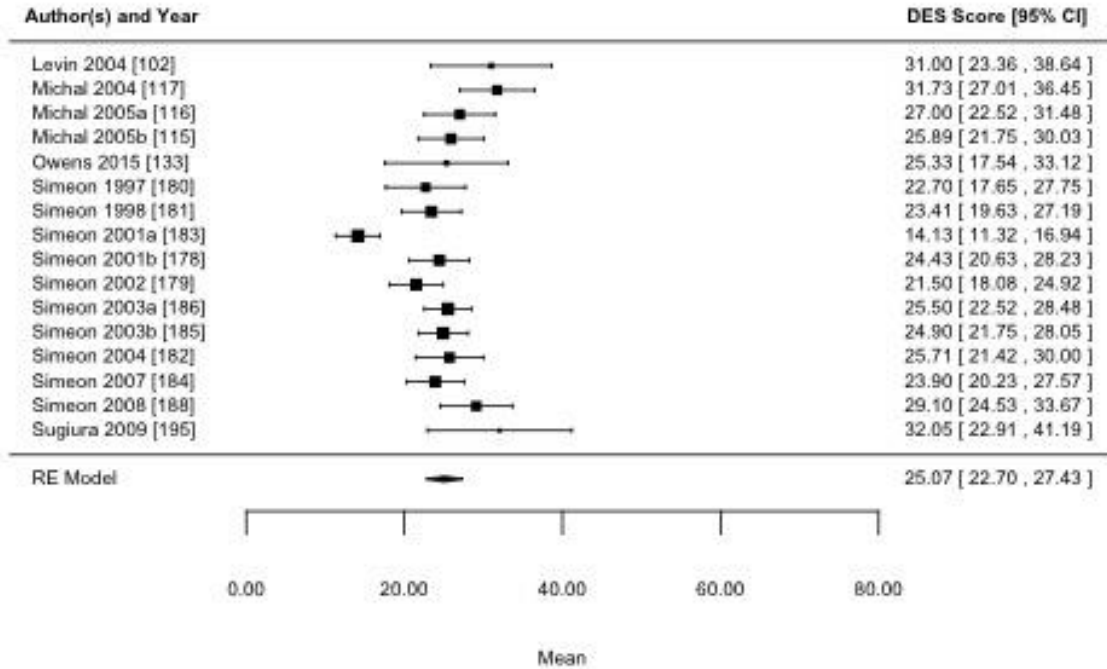

## Somatic Symptom Disorder

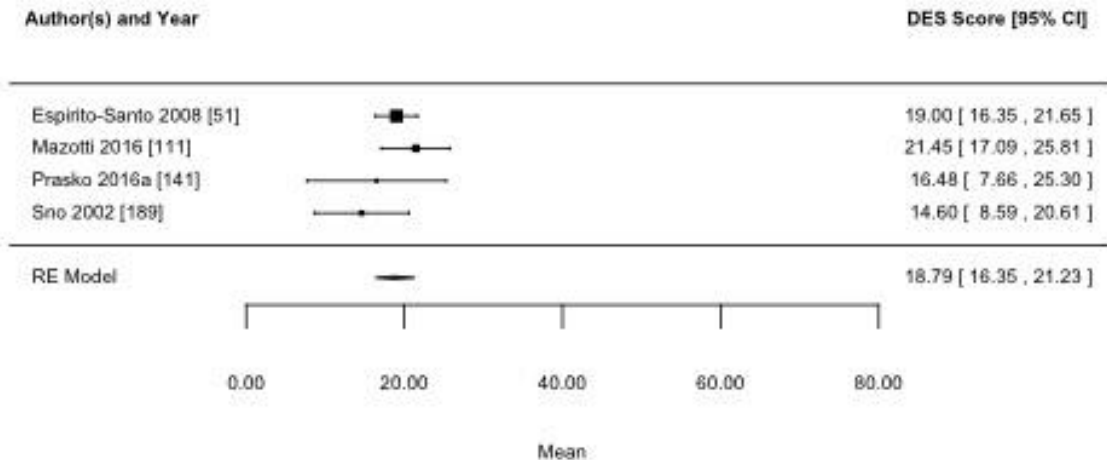

# Conversion Disorder

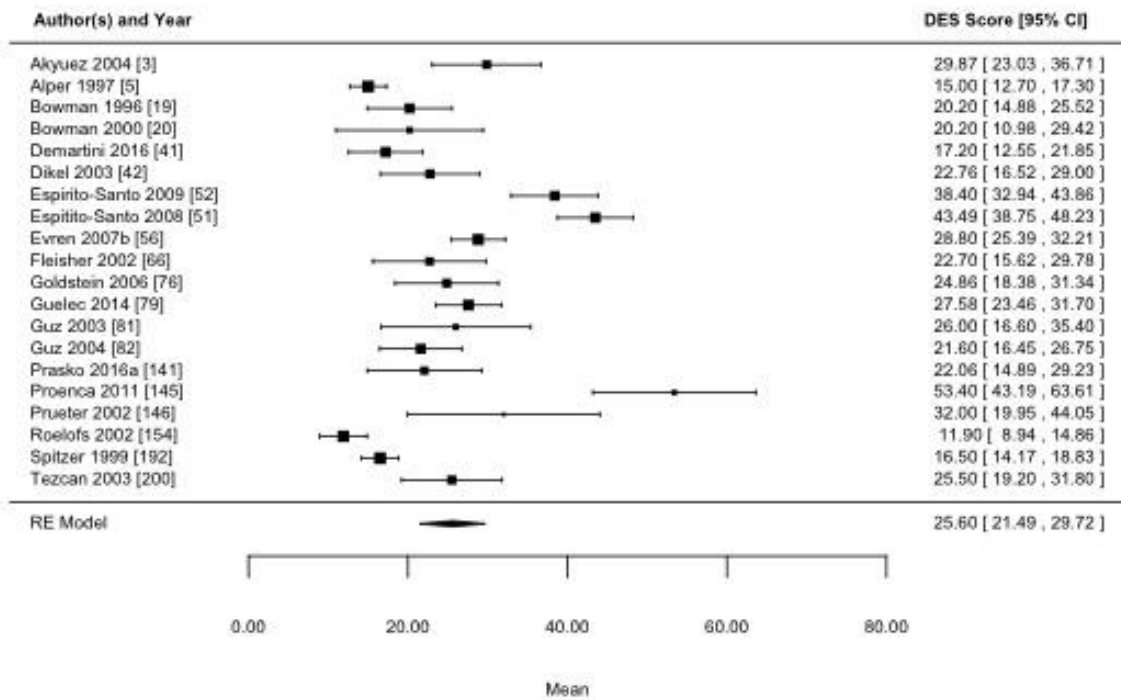

# Feeding and Eating Disorders

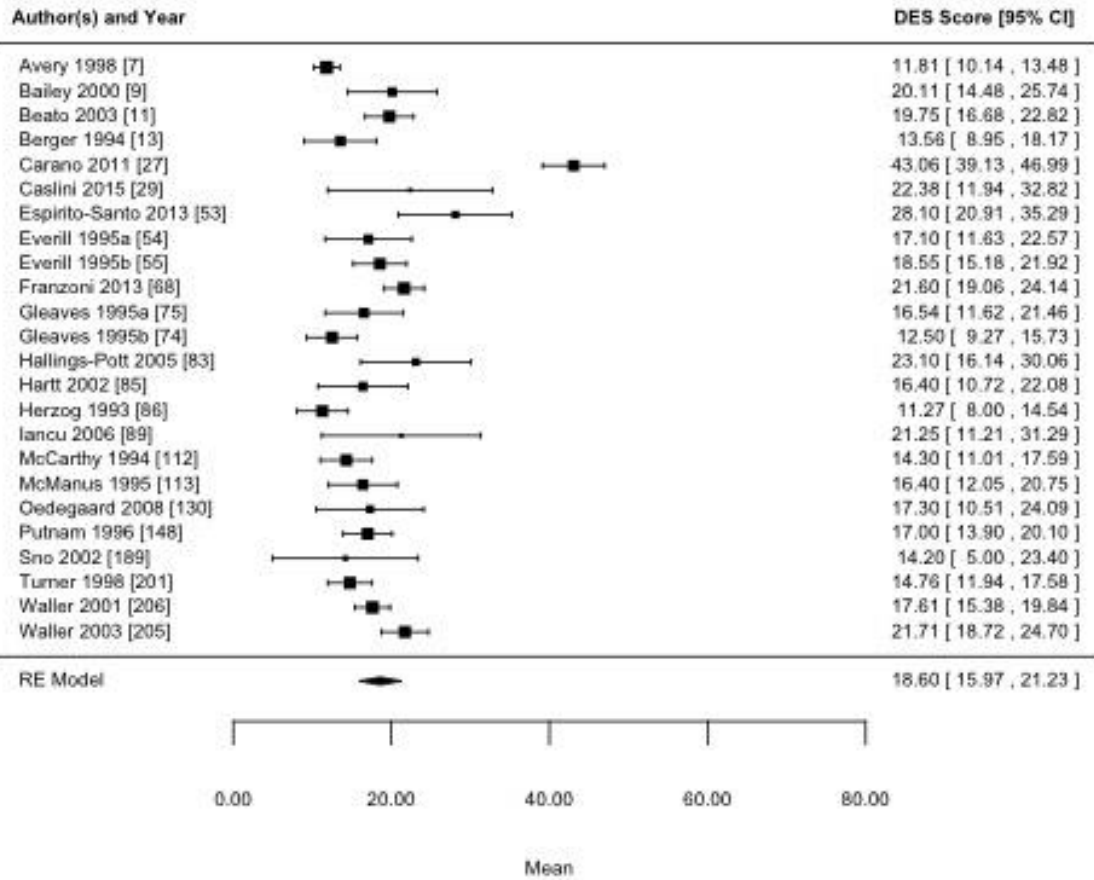

# Anorexia Nervosa

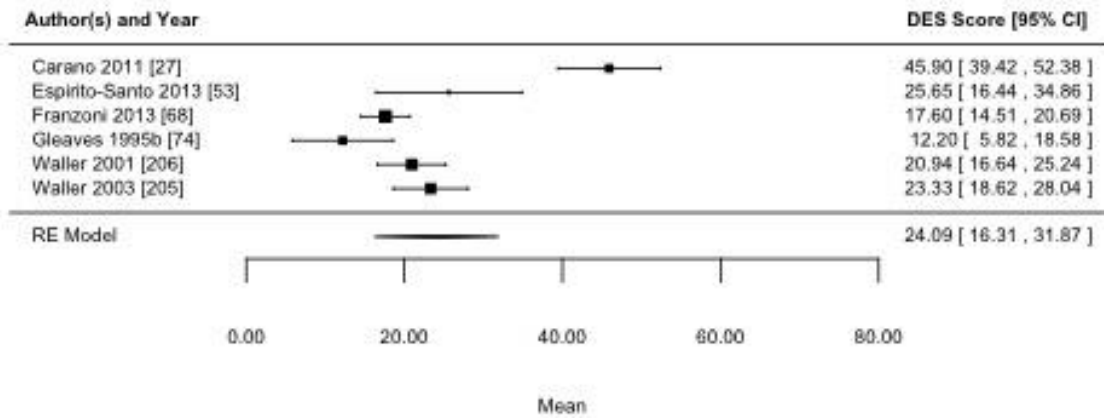

# Bulimia Nervosa

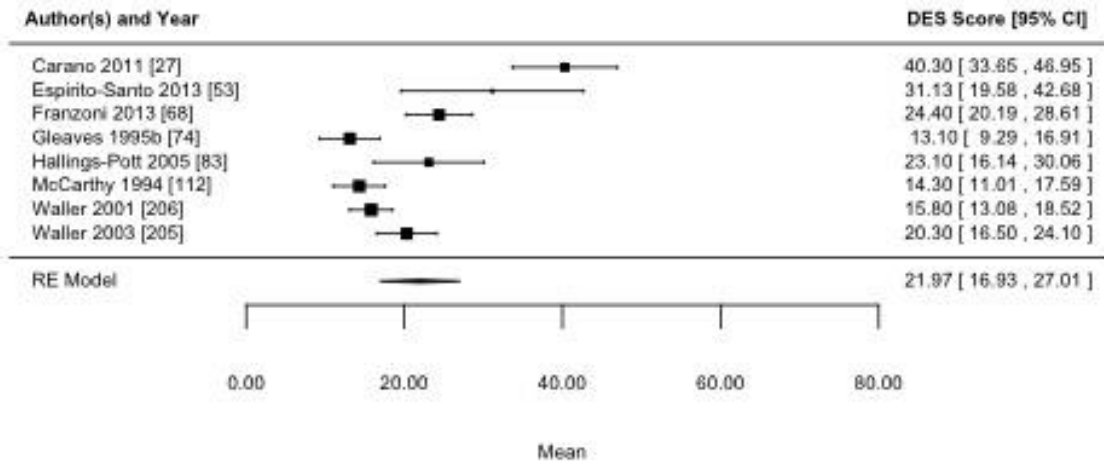

## Alcohol Use Disorder

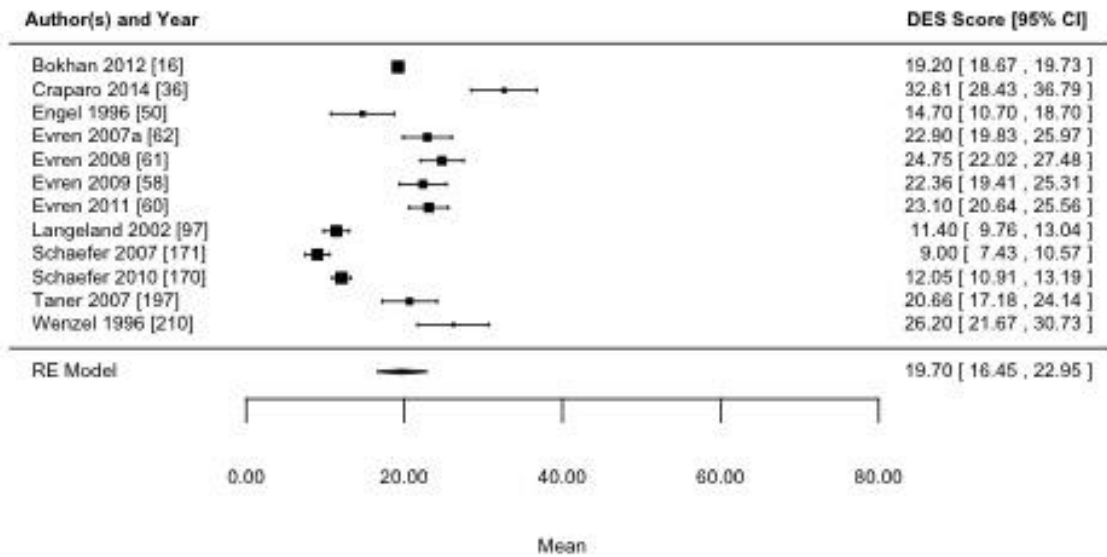

## Other Substance Related Disorders

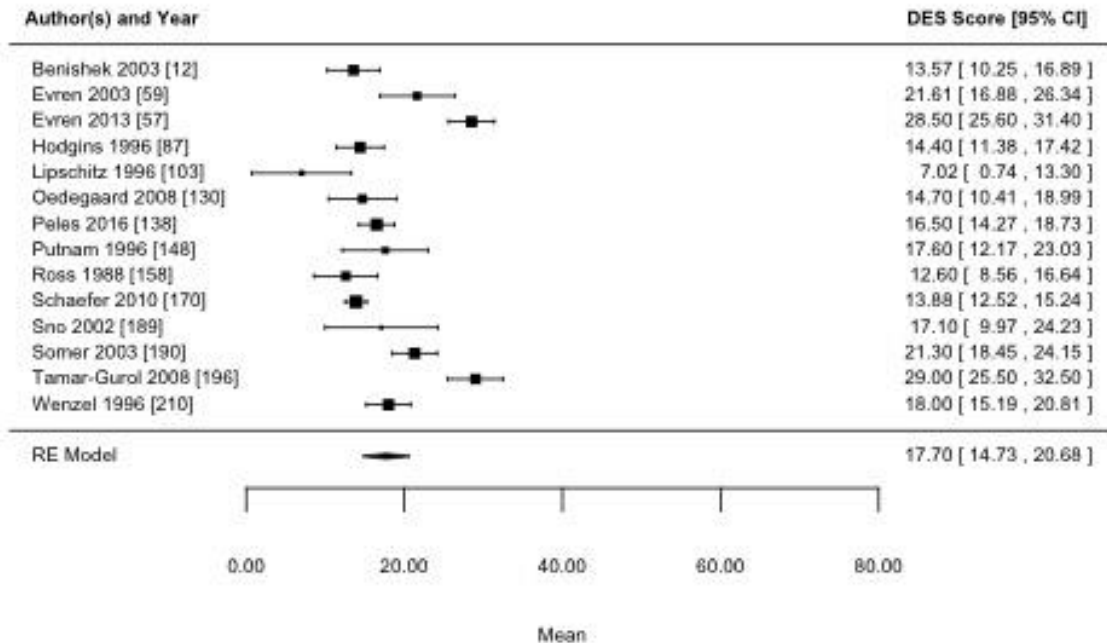

# Gambling Disorder

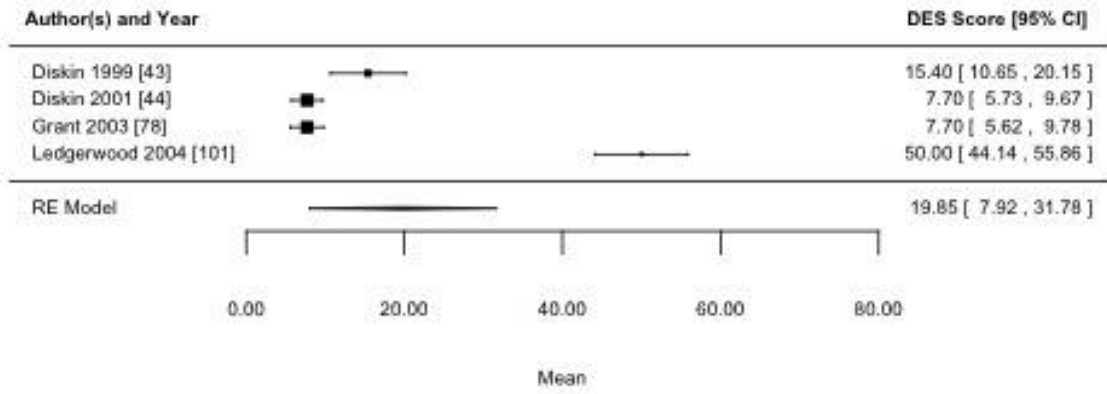



# Borderline Personality Disorder

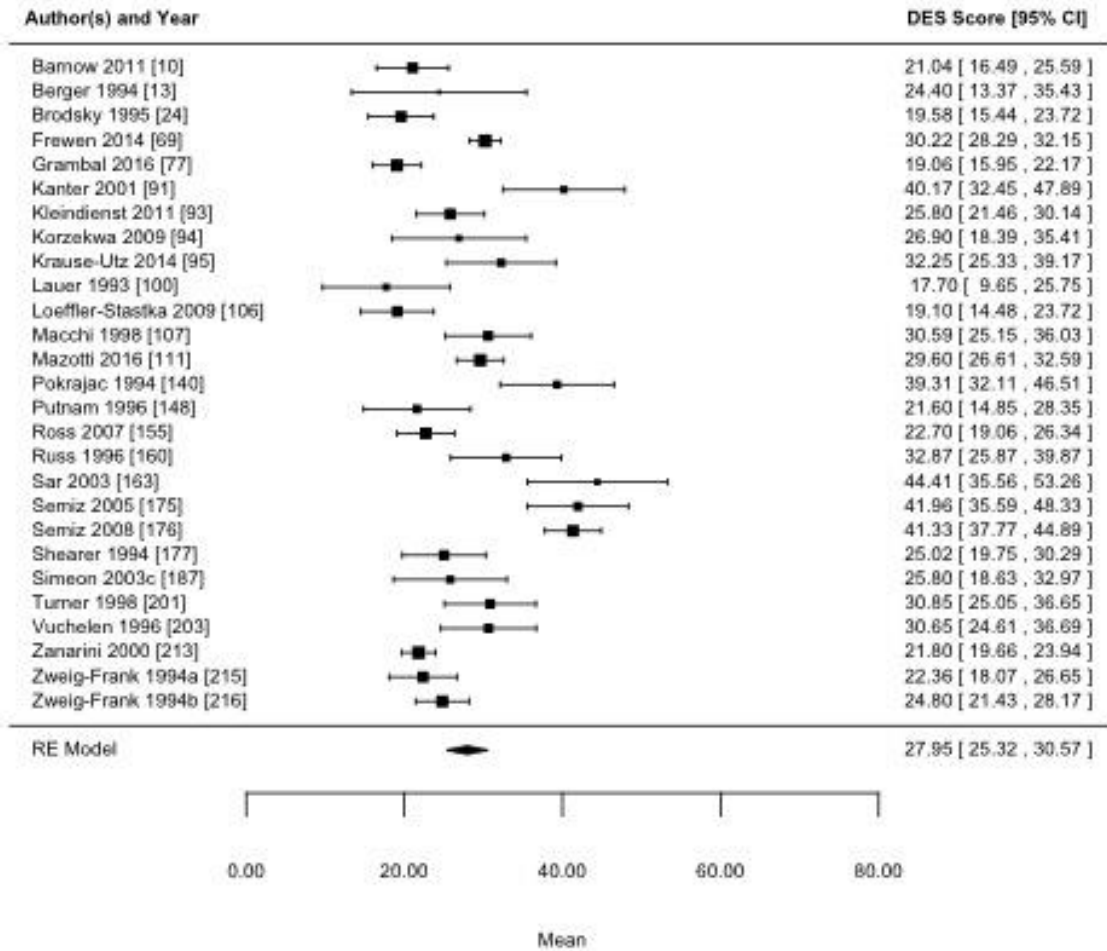

## Reference List of Included Studies

1. Abramowitz EG, Lichtenberg P. A new hypnotic technique for treating combat-related posttraumatic stress disorder: a prospective open study. *Int J Clin Exp Hypn.* 2010;58: 316-328.
2. Agargun MY, Kara H, Ozer OA, Selvi Y, Kiran U, Ozer B. Clinical importance of nightmare disorder in patients with dissociative disorders. *Psychiatry Clin Neurosci.* 2003;57: 575-579.
3. Akyüz G, Kuğu N, Akyüz A, Dogan O. Dissociation and childhood abuse history in epileptic and pseudoseizure patients. *Epileptic Disord.* 2004;6: 187-192.
4. Akyüz G, Kuğu N, Sar V, Doğan O. Trauma and dissociation among prisoners. *Nordic Journal of Psychiatry.* 2007;61: 167-172.
5. Alper K, Devinsky O, Perrine K, Luciano D, Vazquez B, Pacia S, et al. Dissociation in epilepsy and conversion nonepileptic seizures. *Epilepsia.* 1997;38: 991-997.
6. Amdur RL, Liberzon I. Dimensionality of dissociation in subjects with PTSD. *Dissociation: Progress in the Dissociative Disorders.* 1996;9: 118-124.
7. Avery LC. A test of the escape model of binge eating and feminist identity development. Dissertation, US: ProQuest Information & Learning. 1998.
8. Aydin A, Barut Y, Kalafat T, Boysan M, Besiroglu L. Psychometric properties of the Turkish version of the PTSD Symptom Scale-Self-Report (PSS-SR). *Anatolian Journal of Psychiatry.* 2012;13: 125-130.
9. Bailey PM. An examination of the relationship between childhood sexual abuse, dissociation, and eating disorders. Dissertation, US: ProQuest Information & Learning. 2000.
10. Barnow S, Limberg A, Stopsack M, Spitzer C, Grabe HJ, Freyberger HJ, et al. Dissociation and emotion regulation in borderline personality disorder. *Psychol Med.* 2011;42: 783-794.
11. Beato L, Rodriguez-Cano T, Belmonte A. Relationship of dissociative experiences to body shape concerns in eating disorders. *European Eating Disorders Review.* 2003;11: 38-45.
12. Benishek D, Wichowski HC. Dissociation in adults with a diagnosis of substance abuse. *Nurs Times.* 2003;99: 34-36.
13. Berger D, Saito S, Ono Y, Tezuka I, Shirahase J, Kuboki T, et al. Dissociation and child abuse histories in an eating disorder cohort in Japan. *Acta Psychiatr Scand.* 1994;90: 274-280.
14. Bob P, Susta M, Glaslova K, Boutros NN. Dissociative symptoms and interregional EEG cross-correlations in paranoid schizophrenia. *Psychiatry Res.* 2010;177: 37-40.
15. Bob P, Susta M, Gregusova A, Jasova D. Dissociation, cognitive conflict and nonlinear patterns of heart rate dynamics in patients with unipolar depression. *Prog Neuropsychopharmacol Biol Psychiatry.* 2009;33: 141-145.
16. Bokhan N, Ovchinnikov A. P-14 - Dissociative mechanisms of formation of alcoholism in patients with co-morbid posttraumatic stress disorder. *Eur Psychiatry.* 2012;27: 1-1.

17. Bolu A, Pan E, Günay H, Öznur T, Aydemir E, Erdem M. Travma sonrası stres bozukluğunda saldırgan davranış ile dissosiyasyon arasındaki ilişki. (Turkish). *Gulhane Medical Journal*. 2014;56: 97-101.
18. Boon S, Draijer N. Multiple personality disorder in the Netherlands: a clinical investigation of 71 patients. *Am J Psychiatry*. 1993;150: 489-494.
19. Bowman ES, Coons PM. The differential diagnosis of epilepsy, pseudoseizures, dissociative identity disorder, and dissociative disorder not otherwise specified. *Bull Menninger Clin*. 2000;64: 164-180.
20. Bowman ES, Markand ON. Psychodynamics and psychiatric diagnoses of pseudoseizure subjects. *Am J Psychiatry*. 1996;153: 57-63.
21. Braehler C, Valiquette L, Holowka D, Malla AK, Joober R, Ciampi A, et al. Childhood trauma and dissociation in first-episode psychosis, chronic schizophrenia and community controls. *Psychiatry Res*. 2013;210: 36-42.
22. Branscomb LP. Dissociation in combat-related post-traumatic stress disorder. *Dissociation: Progress in the Dissociative Disorders*. 1991;4: 13-20.
23. Bremner JD, Southwick S, Brett E, Fontana A, Rosenheck R, Charney DS. Dissociation and posttraumatic stress disorder in Vietnam combat veterans. *Am J Psychiatry*. 1992;149: 328-332.
24. Brodsky BS, Cloitre M, Dulit RA. Relationship of dissociation to self-mutilation and childhood abuse in borderline personality disorder. *Am J Psychiatry*. 1995;152: 1788-1792.
25. Bru MT, Santamaría M, Coronas R, Cobo JV. Trastorno disociativo y acontecimientos traumáticos. Un estudio en población española = Dissociative disorder and traumatic events. A study of the Spanish population. *Actas Españolas De Psiquiatria*. 2009;37: 200-204.
26. Callegari C, Diurni M, Baranzini F, Bolla E, Bortolaso P, Ceccon F, et al. Alterazioni dissociative della coscienza: uno studio preliminare = Dissociative alterations of the consciousness: a preliminary study. *Minerva Psichiatr*. 2007;48: 259-268.
27. Carano A, Totaro E, De Berardis D, Mancini L, Faiella F, Pontalti I, et al. Correlazioni tra insoddisfazione corporea, alessitimia e dissociazione nei disturbi del comportamento alimentare = Correlations between bodily dissatisfaction, alexithymia, and dissociation in eating disorders. *Italian Journal of Psychopathology*. 2011;17: 174-182.
28. Carlson EB, Putnam FW, Ross CA, Torem M, Coons P, Dill DL, et al. Validity of the dissociative experiences scale in screening for multiple personality disorder: a multicenter study. *Am J Psychiatry*. 1993;150: 1030-1036.
29. Caslini M, Rivolta L, Zappa LE, Carrà G, Clerici M. Psychotherapeutic treatment of eating disorders improve dissociative experiences and impulse regulation but not alexithymia. A case series report. *Rivista di Psichiatria*. 2015;50: 143-147.
30. Castillo JJM, de la Iglesia JM, Colomer CA, Berrios G, Sierra M, Luque LR. Cross-cultural adaptation and validation of the Cambridge Depersonalisation Scale. *Actas Españolas De Psiquiatria*. 2006;34: 185-192.

31. Castro-Fernández MdP, Perona-Garcelán S, Senín-Calderón C, Rodríguez-Testal JF. Relación entre trauma, disociación y síntomas psicóticos positivos [Relationship of trauma, dissociation, and positive psychotic symptoms]. *Acción Psicológica*. 2015;12: 95-108.
32. Chae S, Sim M, Lim M, Na J, Kim D. Multivariate analysis of relationship between childhood trauma and psychotic symptoms in patients with schizophrenia. *Psychiatry Investig*. 2015;12: 397-401.
33. Chard KM. An evaluation of cognitive processing therapy for the treatment of posttraumatic stress disorder related to childhood sexual abuse. *J Consult Clin Psychol*. 2005;73: 965-971.
34. Choe BM, Kluft RP. The use of the DES in studying treatment outcome with dissociative identity disorder: a pilot study. *Dissociation: Progress in the Dissociative Disorders*. 1995;8: 160-164.
35. Colizzi M, Costa R, Todarello O. Dissociative symptoms in individuals with gender dysphoria: Is the elevated prevalence real? *Psychiatry Res*. 2015;226: 173-180.
36. Craparo G, Ardino V, Gori A, Caretti V. The relationships between early trauma, dissociation, and alexithymia in alcohol addiction. *Psychiatry Investig*. 2014;11: 330-335.
37. Crowson JJ, Frueh BC, Beidel DC, Turner SM. Self-reported symptoms of social anxiety in a sample of combat veterans with posttraumatic stress disorder. *J Anxiety Disord*. 1998;12: 605-612.
38. Damsa C, Lazignac C, Miller N, Maris S, Adam E, Rossignon K. Lipid levels in dissociative disorders: effects of psychodynamic psychotherapy. *Psychiatr Q*. 2014;85: 369-376.
39. Dasse MN, Juback SK, Morissette SB, Dolan SL, Weaver III CA. False memory susceptibility in OEF/OIF veterans with and without PTSD. *Mil Psychol*. 2015;27: 354-365.
40. Dell PF. Dissociative phenomenology of dissociative identity disorder. *J Nerv Ment Dis*. 2002;190: 10-15.
41. Demartini B, Goeta D, Barbieri V, Ricciardi L, Canevini MP, Turner K, et al. Psychogenic non-epileptic seizures and functional motor symptoms: A common phenomenology? *J Neurol Sci*. 2016;368: 49-54.
42. Dikel TN, Fennell EB, Gilmore RL. Posttraumatic stress disorder, dissociation, and sexual abuse history in epileptic and nonepileptic seizure patients. *Epilepsy Behav*. 2003;4: 644-650.
43. Diskin KM, Hodgins DC. Narrowing of attention and dissociation in pathological video lottery gamblers. *J Gambl Stud*. 1999;15: 17-28.
44. Diskin KM, Hodgins DC. Narrowed focus and dissociative experiences in a community sample of experienced video lottery gamblers. *Canadian Journal of Behavioural Science, Revue Canadienne Des Sciences Du Comportement*. 2001;33: 58-64.

45. Dorahy MJ, Middleton W, Irwin HJ. The effect of emotional context on cognitive inhibition and attentional processing in dissociative identity disorder. *Behav Res Ther.* 2005;43: 555-568.
46. Draijer N, Boon S. The validation of the Dissociative Experiences Scale against the criterion of the SCID-D, using receiver operating characteristics (ROC) analysis. *Dissociation: Progress in the Dissociative Disorders.* 1993;6: 28-37.
47. Ebrinc S, Semiz U, Basoglu C, Cetin M, Agargun M, Algul A, et al. Self-mutilating behavior in patients with dissociative disorders: the role of innate hypnotic capacity. *Isr J Psychiatry Relat Sci.* 2008;45: 39-48.
48. El-Hage W, Gaillard P. Incidence clinique des psychotraumatismes dans la consultation externe d'un service de psychiatrie = Clinical impact of psychotraumas in outpatients' department of psychiatry. *Annales Medico-psychologiques, Revue Psychiatrique.* 2003;161: 743-748.
49. Ellason JW, Ross CA, Day HD. Spirituality and ego strength in dissociative identity disorder. *American Journal of Pastoral Counseling.* 2003;6: 43-49.
50. Engel CC, Walker EA, Katon WJ. Factors related to dissociation among patients with gastrointestinal complaints. *J Psychosom Res.* 1996;40: 643-653.
51. Espirito-Santo H, Gonçalves L, Rocha P, Cassimo S. Psychoform and somatoform dissociation severity in eating disorders. *Eur Psychiatry.* 2013;28: 1-1.
52. Espirito-Santo H, Pio-Abreu JL. Demographic and mental health factors associated with pathological dissociation in a Portuguese sample. *Journal of Trauma & Dissociation.* 2008;9: 369-387.
53. Espirito-Santo H, Pio-Abreu JL. Psychiatric symptoms and dissociation in conversion, somatization and dissociative disorders. *Aust N Z J Psychiatry.* 2009;43: 270-276.
54. Everill J, Waller G, Macdonald W. Dissociation in bulimic and non-eating-disordered women. *Int J Eat Disord.* 1995a;17: 127-134.
55. Everill J, Waller G, Macdonald W. Reported sexual abuse and bulimic symptoms: the mediating role of dissociation. *Dissociation: Progress in the Dissociative Disorders.* 1995b;8: 155-159.
56. Evren C, Can S. Clinical correlates of dissociative tendencies in male soldiers with conversion disorder. *Isr J Psychiatry Relat Sci.* 2007b;44: 33-39.
57. Evren C, Cinar O, Evren B, Ulku M, Karabulut V, Umut G. The mediator roles of trait anxiety, hostility, and impulsivity in the association between childhood trauma and dissociation in male substance-dependent inpatients. *Compr Psychiatry.* 2013;54: 158-166.
58. Evren C, Durkaya M, Celik R, Dalbudak E, Cakmak D, Flannery B. Relationship of alcohol craving with alexithymia and dissociation in male alcohol dependent inpatients. *Anatolian Journal of Psychiatry.* 2009;10: 165-173.
59. Evren C, Ögel K. Alkol/madde bağımlılarında dissosiyatif belirtiler ve çocukluk çağı travması, depresyon, anksiyete ve alkol/madde kullanımı ile ilişkisi. = Dissociative symptoms among alcohol and substance dependents and its relationships with childhood

- trauma history, depression, anxiety, and alcohol/substance use. *Anatolian Journal of Psychiatry*. 2003;4: 30-37.
60. Evren C, Sar V, Dalbudak E, Cetin R, Durkaya M, Evren B, et al. Lifetime PTSD and quality of life among alcohol-dependent men: impact of childhood emotional abuse and dissociation. *Psychiatry Res*. 2011;186: 85-90.
  61. Evren C, Sar V, Evren B, Semiz U, Dalbudak E, Cakmak D. Dissociation and alexithymia among men with alcoholism. *Psychiatry Clin Neurosci*. 2008;62: 40-47.
  62. Evren C, Sar V, Karadag F, Gurol DT, Karagoz M. Dissociative disorders among alcohol-dependent inpatients. *Psychiatry Res*. 2007a;152: 233-241.
  63. Fan Q, Yu J, Ross CA, Keyes BB, Dai Y, Zhang T, et al. Teaching chinese psychiatrists to make reliable dissociative disorder diagnoses. *Transcultural Psychiatry*. 2011;48: 473-483.
  64. Favaro A, Degortes D, Colombo G, Santonastaso P. The effects of trauma among kidnap victims in Sardinia, Italy. *Psychol Med*. 2000;30: 975-980.
  65. Favaro A, Tenconi E, Colombo G, Santonastaso P. Full and partial post-traumatic stress disorder among World War II prisoners of war. *Psychopathology*. 2006;39: 187-191.
  66. Fleisher W, Staley D, Krawetz P, Pillay N, Arnett JL, Maher J. Comparative study of trauma-related phenomena in subjects with pseudoseizures and subjects with epilepsy. *Am J Psychiatry*. 2002;159: 660-663.
  67. Fontenelle LF, Domingues AM, Souza WF, Mendlowicz MV, de Menezes GB, Figueira IL, et al. History of trauma and dissociative symptoms among patients with obsessive-compulsive disorder and social anxiety disorder. *Psychiatric Quarterly*. 2007;78: 241-250.
  68. Franzoni E, Gualandi S, Caretti V, Schimmenti A, Di Pietro E, Pellegrini G, et al. The relationship between alexithymia, shame, trauma, and body image disorders: investigation over a large clinical sample. *Neuropsychiatr Dis Treat*. 2013;9: 185-193.
  69. Frewen P, Kleindienst N, Lanius R, Schmahl C. Trauma-related altered states of consciousness in women with BPD with or without co-occurring PTSD. *European Journal of Psychotraumatology*. 2014;5.
  70. Frischholz EJ, Braun BG, Sachs RG, Hopkins L. The Dissociative Experiences Scale: further replication and validation. *Dissociation: Progress in the Dissociative Disorders*. 1990;3: 151-153.
  71. Frueh BC, Mirabella RF, Chobot K, Fossey MD. Chronicity of symptoms in combat veterans with PTSD treated by the VA mental health system. *Psychol Rep*. 1994;75: 843-848.
  72. García RR, Rico SEG, Agráz FP. Evaluación de trastornos disociativos en población psiquiátrica mexicana: Prevalencia, comorbilidad y características psicométricas de la Escala de Experiencias Disociativas = Dissociative disorders in mexican psychiatric patients: prevalence, comorbidity and Dissociative Experiences Scale psychometric properties. *Salud Mental*. 2006;29: 38-43.
  73. Geraerts E, Kozarić-Kovačić D, Merckelbach H, Peraica T, Jelicic M, Candel I. Traumatic memories of war veterans: not so special after all. *Conscious Cogn*. 2007;16: 170-177.

74. Gleaves DH, Eberenz KP. Correlates of dissociative symptoms among women with eating disorders. *J Psychiatr Res.* 1995b;29: 417-426.
75. Gleaves DH, Eberenz KP, Warner MS, Fine CG. Measuring clinical and non-clinical dissociation: a comparison of the DES and QED. *Dissociation: Progress in the Dissociative Disorders.* 1995a;8: 24-31.
76. Goldstein LH, Mellers JDC. Ictal symptoms of anxiety, avoidance behaviour, and dissociation in patients with dissociative seizures. *Journal of Neurology Neurosurgery and Psychiatry.* 2006;77: 616-621.
77. Grambal A, Prasko J, Kamaradova D, Latalova K, Holubova M, Sedláčková Z, et al. Quality of life in borderline patients comorbid with anxiety spectrum disorders—a cross-sectional study. *Patient Preference and Adherence.* 2016;10: 1421-1433.
78. Grant JE, Kim SW. Dissociative symptoms in pathological gambling. *Psychopathology.* 2003;36: 200-203.
79. Güleç MY, Ýnanç L, Yanartaþ Ö, Üzer A, Güleç H. Predictors of suicide in patients with conversion disorder. *Compr Psychiatry.* 2014;55: 457-462.
80. Gulsun M, Doruk A, Uzun O, Turkbay T, Ozsahin A. Effect of dissociative experiences on drug treatment of panic disorder. *Clin Drug Investig.* 2007;27: 583-590.
81. Guz H, Doganay Z, Ozkan A, Colak E, Tomac A, Sarisoy G. Conversion and somatization disorders: dissociative symptoms and other characteristics. *J Psychosom Res.* 2004;56: 287-291.
82. Guz H, Doganay Z, Ozkan A, Colak E, Tomac A, Sarisoy G. Conversion disorder and its subtypes: a need for a reclassification. *Nordic Journal of Psychiatry.* 2003;57: 377-381.
83. Hallings-Pott C, Waller G, Watson D, Scragg P. State dissociation in bulimic eating disorders: an experimental study. *Int J Eat Disord.* 2005;38: 37-41.
84. Hara K, Adachi N, Akanuma N, Ito M, Okazaki M, Matsubara R, et al. Dissociative experiences in epilepsy: Effects of epilepsy-related factors on pathological dissociation. *Epilepsy Behav.* 2015;44: 185-191.
85. Hartt J, Waller G. Child abuse, dissociation, and core beliefs in bulimic disorders. *Child Abuse Negl.* 2002;26: 923-938.
86. Herzog DB, Staley JE, Carmody S, Robbins WM, van der Kolk BA. Childhood sexual abuse in anorexia nervosa and bulimia nervosa: a pilot study. *J Am Acad Child Adolesc Psychiatry.* 1993;32: 962-966.
87. Hodgins DC, Pennington M, el-Guebaly N, Dufour M. Correlates of dissociative symptoms in substance abusers. *J Nerv Ment Dis.* 1996;184: 636-639.
88. Horen SA, Leichner PP, Lawson JS. Prevalence of dissociative symptoms and disorders in an adult psychiatric inpatient population in Canada. *Canadian Journal of Psychiatry.* 1995;40: 185-191.
89. Iancu I, Cohen E, Yehuda YB, Kotler M. Treatment of eating disorders improves eating symptoms but not alexithymia and dissociation proneness. *Compr Psychiatry.* 2006;47: 189-193.

90. Kamaradova D, Prasko J, Brunovsky M, Grambal A, Diveky T, Latalova K. What are demographic and EEG differences between responding and non-responding panic disorder patients. *Neuro Endocrinol Lett.* 2013;34: 162-171.
91. Kanter JW, Parker CR, Kohlenberg RJ. Finding the self: a behavioral measure and its clinical implications. *Psychotherapy.* 2001;38: 198-211.
92. Karatzias T, Power K, Brown K, McGoldrick T. Posttraumatic symptomatology and dissociation in outpatients with chronic posttraumatic stress disorder. *Journal of Trauma & Dissociation.* 2010;11: 83-92.
93. Kleindienst N, Limberger MF, Ebner-Priemer UW, Keibel-Mauchnik J, Dyer A, Berger M, et al. Dissociation predicts poor response to dialectical behavioral therapy in female patients with borderline personality disorder. *Journal of Personality Disorders.* 2011;25: 432-447.
94. Korzekwa MI, Dell PF, Links PS, Thabane L, Fougere P. Dissociation in borderline personality disorder: a detailed look. *Journal of Trauma & Dissociation.* 2009;10: 346-367.
95. Krause-Utz A, Veer IM, Rombouts S, Bohus M, Schmahl C, Elzinga BM. Amygdala and anterior cingulate resting-state functional connectivity in borderline personality disorder patients with a history of interpersonal trauma. *Psychol Med.* 2014;44: 2889-2901.
96. Landre L, Destrieux C, Andersson F, Barantin L, Quide Y, Tapia G, et al. Working memory processing of traumatic material in women with posttraumatic stress disorder. *J Psychiatry Neurosci.* 2012;37: 87-94.
97. Langeland W, Draijer N, van den Brink W. Trauma and dissociation in treatment-seeking alcoholics: towards a resolution of inconsistent findings. *Compr Psychiatry.* 2002;43: 195-203.
98. Latalova K, Prasko J, Diveky T, Kamaradova D, Velartova H. Cognitive dysfunction, dissociation and quality of life in bipolar affective disorders in remission. *Psychiatria Danubina.* 2010;22: 528-534.
99. Latz T, Kramer S, Hughes D. Multiple personality disorder among female inpatients in a state hospital. *Am J Psychiatry.* 1995;152: 1343-1348.
100. Lauer J, Black DW, Keen P. Multiple personality disorder and borderline personality disorder: distinct entities or variations on a common theme? *Ann Clin Psychiatry.* 1993;5: 129-134.
101. Ledgerwood DM, Petry NM. Gambling and suicidality in treatment-seeking pathological gamblers. *J Nerv Ment Dis.* 2004;192: 711-714.
102. Levin R, Sirof B, Simeon D, Guralnick O. Role of fantasy proneness, imaginative involvement, and psychological absorption in depersonalization disorder. *J Nerv Ment Dis.* 2004;192: 69-71.
103. Lipschitz DS, Kaplan ML, Sorkenn J, Chorney P, Asnis GM. Childhood abuse, adult assault, and dissociation. *Compr Psychiatry.* 1996;37: 261-266.
104. Lochner C, Seedat S, Hemmings SMJ, Kinnear CJ, Corfield VA, Niehaus DJH, et al. Dissociative experiences in obsessive-compulsive disorder and trichotillomania: clinical and genetic findings. *Compr Psychiatry.* 2004;45: 384-391.



105. Lochner C, Seedat S, Hemmings SMJ, Moolman-Smook JC, Kidd M, Stein DJ. Investigating the possible effects of trauma experiences and 5-HTT on the dissociative experiences of patients with OCD using path analysis and multiple regression. *Neuropsychobiology*. 2007;56: 6-13.
106. Löffler-Stastka H, Szerencsics M, Blüml V. Dissociation, trauma, affect regulation and personality in patients with a borderline personality organization. *Bull Menninger Clin*. 2009;73: 81-98.
107. Macchi B, Bertin I, Bombi AF, Colombo G. Disturbi di personalità e dissociazione di coscienza: Studio controllato su un campione di pazienti con disturbo borderline della personalità. = Personality disorders and dissociative symptoms. A controlled study on a clinical sample with borderline personality disorder. *Minerva Psichiatr*. 1998;39: 67-72.
108. Majohr KL, Leenen K, Grabe HJ, Jenewein J, Nunez DG, Rufer M. Alexithymia and its relationship to dissociation in patients with panic disorder. *J Nerv Ment Dis*. 2011;199: 773-777.
109. Martínez-Taboas A. The use of the Dissociative Experiences Scale in Puerto Rico. *Dissociation: Progress in the Dissociative Disorders*. 1995;8: 10.
110. Matlack LG. Intrapyschic and interpersonal sequelae of chronic psychological trauma: the relationship between dissociation and interpersonal problems. Dissertation, US: ProQuest Information & Learning. 2010.
111. Mazzotti E, Farina B, Imperatori C, Mansutti F, Prunetti E, Speranza AM, et al. Is the dissociative experiences scale able to identify detachment and compartmentalization symptoms? Factor structure of the dissociative experiences scale in a large sample of psychiatric and nonpsychiatric subjects. *Neuropsychiatr Dis Treat*. 2016;12: 1295-1302.
112. McCarthy MK, Coff DC, Baer L, Cioffi J, Herzog DB. Dissociation, childhood trauma, and the response to Fluoxetine in bulimic patients. *Int J Eat Disord*. 1994;15: 219-226.
113. McManus F. Dissociation and the severity of bulimic psychopathology among eating-disordered and non-eating-disordered women. *European Eating Disorders Review*. 1995;3: 185-195.
114. Merckelbach H, Wessel I. Memory for actions and dissociation in obsessive-compulsive disorder. *J Nerv Ment Dis*. 2000;188: 846-848.
115. Michal M, Kaufhold J, Engelbach U, Lenz C, Lischke M, Overbeck G, et al. The validity of the depersonalisation-derealisation scale of the narcissism-inventory. *Psychotherapie Psychosomatik Medizinische Psychologie*. 2005b;55: 512-516.
116. Michal M, Sann U, Grabhorn R, Overbeck G, Röder CH. Zur Prävalenz von Depersonalisation und Derealisation in der stationären Psychotherapie. = On the prevalence of depersonalization and derealization in inpatient psychotherapy. *Psychotherapeut*. 2005a;50: 328-339.
117. Michal M, Sann U, Niebecker M, Lazanowsky C, Kernhof K, Aurich S, et al. Die Erfassung des Depersonalisations-Derealisations-Syndroms mit der deutschen Version der Cambridge Depersonalisation Scale (CDS). = The measurement of the depersonalisation-derealisation-syndrome with the German version of the Cambridge Depersonalisation

- Scale (CDS). *PPmP: Psychotherapie Psychosomatik Medizinische Psychologie*. 2004;54: 367-374.
118. Mickleborough MTS, Daniels JK, Coupland NJ, Kao R, Williamson PC, Lanius UF, et al. Effects of trauma-related cues on pain processing in posttraumatic stress disorder: an fMRI investigation. *J Psychiatry Neurosci*. 2011;36: 6-14.
  119. Modestin J, Ebner G, Junghan M, Erni T. Dissociative experiences and dissociative disorders in acute psychiatric inpatients. *Compr Psychiatry*. 1996;37: 355-361.
  120. Modestin J, Hermann S, Endrass J. Schizoidia in schizophrenia spectrum and personality disorders: role of dissociation. *Psychiatry Res*. 2007;153: 111-118.
  121. Molina-Serrano A, Linotte S, Amat M, Souery D, Barreto M. Dissociation in major depressive disorder: a pilot study. *Journal of Trauma & Dissociation*. 2008;9: 411-421.
  122. Moscariello MM, Ratti F, Quartini A, Forcén FE, Munuera JN, Bersani G. Presenza di elementi dissociativi in pazienti con disturbi dell'umore e disturbi d'ansia. = Dissociative symptoms in patients with mood and anxiety disorders. *Rivista Di Psichiatria*. 2010;45: 234-243.
  123. Mula M, Pini S, Preve M, Masini M, Giovannini I, Cassano GB. Clinical correlates of depersonalization symptoms in patients with bipolar disorder. *J Affect Disord*. 2009;115: 252-256.
  124. Najavits LM, Walsh M. Dissociation, PTSD, and substance abuse: an empirical study. *Journal of Trauma & Dissociation*. 2012;13: 115-126.
  125. Nardo D, Högberg G, Lanius RA, Jacobsson H, Jonsson C, Hällström T, et al. Gray matter volume alterations related to trait dissociation in PTSD and traumatized controls. *Acta Psychiatr Scand*. 2013;128: 222-233.
  126. Nejad AG, Farahati H. Dissociative disorders and dissociative symptoms among veterans of the Iraq-Iran war suffering from chronic posttraumatic disorder. *Neurosciences*. 2007;12: 318-321.
  127. Nijenhuis ERS, Spinhoven P, van Dyck R, van der Hart O, de Graaf A, Knoppert EAM. Dissociative pathology discriminates between bipolar mood disorder and dissociative disorder. *Br J Psychiatry*. 1997;170: 581-581.
  128. Nijenhuis ERS, van Dyck R, Spinhoven P, van der Hart O, Chatrou M, Vanderlinden J, et al. Somatoform dissociation discriminates among diagnostic categories over and above general psychopathology. *Aust N Z J Psychiatry*. 1999;33: 511-520.
  129. Ociskova M, Prasko J, Kamaradova D, Grambal A, Sigmundova Z. Individual correlates of self-stigma in patients with anxiety disorders with and without comorbidities. *Neuropsychiatr Dis Treat*. 2015;11: 1767-1779.
  130. Odegaard KJ, Neckelmann D, Benazzi F, Syrstad VE, Akiskal HS, Fasmer OB. Dissociative experiences differentiate bipolar-II from unipolar depressed patients: the mediating role of cyclothymia and the Type A behaviour speed and impatience subscale. *J Affect Disord*. 2008;108: 207-216.

131. Owens AP, David AS, Low DA, Mathias CJ, Sierra-Siegert M. Abnormal cardiovascular sympathetic and parasympathetic responses to physical and emotional stimuli in depersonalization disorder. *Front Neurosci.* 2015;9.
132. Özdemir B, Celik C, Oznur T. Assessment of dissociation among combat-exposed soldiers with and without posttraumatic stress disorder. *European Journal of Psychotraumatology.* 2015;6.
133. Özten E, Sayar GH, Eryılmaz G, Kağan G, Işık S, Karamustafalıoğlu O. The relationship of psychological trauma with trichotillomania and skin picking. *Neuropsychiatr Dis Treat.* 2015;11: 1203-1210.
134. Öztürk E, Sar V. Somatization as a predictor of suicidal ideation in dissociative disorders. *Psychiatry Clin Neurosci.* 2008;62: 662-668.
135. Park S-C, Kim D, Jang EY. Prevalence and symptomatic correlates of interpersonal trauma in South Korean outpatients with major depressive disorder. *Compr Psychiatry.* 2016;66: 46-52.
136. Pastucha P, Prasko J, Grambal A, Latalova K, Sigmundova Z, Sykorova T, et al. Panic disorder and dissociation - comparison with healthy controls. *Neuroendocrinology Letters.* 2009a;30: 774-778.
137. Pastucha P, Prasko J, Grambal A, Latalova K, Sigmundova Z, Tichackova A. Dissociative disorder and dissociation - comparison with healthy controls. *Neuroendocrinology Letters.* 2009b;30: 769-773.
138. Peles E, Seligman Z, Bloch M, Potik D, Sason A, Schreiber S, et al. Sexual abuse and its relation to chronic pain among women from a methadone maintenance clinic versus a sexual abuse treatment center. *J Psychoactive Drugs.* 2016;48: 279-287.
139. Plazzi G, Fabbri C, Pizza F, Serretti A. Schizophrenia-like symptoms in narcolepsy type 1: Shared and distinctive clinical characteristics. *Neuropsychobiology.* 2015;71: 218-224.
140. Pokrajac TM. Dissociative experiences in multiple personality and borderline personality. Dissertation, US: ProQuest Information & Learning. 1994.
141. Prasko J, Grambal A, Kasalova P, Kamaradova D, Ociskova M, Holubova M, et al. Impact of dissociation on treatment of depressive and anxiety spectrum disorders with and without personality disorders. *Neuropsychiatr Dis Treat.* 2016a;12: 2659-2676.
142. Prasko J, Ociskova M, Grambal A, Sigmundova Z, Kasalova P, Marackova M, et al. Personality features, dissociation, self-stigma, hope, and the complex treatment of depressive disorder. *Neuropsychiatr Dis Treat.* 2016b;12: 2539-2552.
143. Prasko J, Raszka M, Adamcova K, Grambal A, Koprivova J, Kudrnovska H, et al. Predicting the therapeutic response to cognitive behavioural therapy in patients with pharmacoresistant obsessive-compulsive disorder. *Neuroendocrinology letters.* 2009;30: 615-623.
144. Prasko J, Raszka M, Diveky T, Grambal A, Kamaradova D, Koprivova J, et al. Obsessive compulsive disorder and dissociation – comparison with healthy controls. *Biomedical Papers.* 2010;154: 179-183.

145. Proenca IC, Castro LH, Jorge CL, Marchetti RL. Emotional trauma and abuse in patients with psychogenic nonepileptic seizures. *Epilepsy Behav.* 2011;20: 331-333.
146. Pruefer C, Schultz-Venrath U, Rimpau W. Dissociative and associated psychopathological symptoms in patients with epilepsy, pseudoseizures, and both seizure forms. *Epilepsia.* 2002;43: 188-192.
147. Ptacek R, Bob P, Paclt I. Dissociative experiences scale - Czech version. *Cesk Psychol.* 2006;50: 262-272.
148. Putnam FW, Carlson EB, Ross CA, Anderson G, Clark P, Torem M, et al. Patterns of dissociation in clinical and nonclinical samples. *J Nerv Ment Dis.* 1996;184: 673-679.
149. Raszka M, Praško J, Adamcová K, Kopřivová J, Vyskočilová J. Disociace a kognitivní funkce u obsedantně-kompulzivní poruchy—Průřezová studie. = Dissociation and cognitive function in obsessive-compulsive disorder—Cross-sectional study. *Ceska Slov Psychiatr.* 2008;104: 289-296.
150. Raszka M, Praško J, Kopřivová J, Novak T, Adamcová K. Psychological dissociation in obsessive-compulsive disorder is associated with anxiety level but not with severity of obsessive-compulsive symptoms. *Neuroendocrinology Letters.* 2009;30: 624-628.
151. Renard SB, Pijnenborg M, Lysaker PH. Dissociation and social cognition in schizophrenia spectrum disorder. *Schizophr Res.* 2012;137: 219-223.
152. Rodewald F, Dell PF, Wilhelm-Göbbling C, Gast U. Are major dissociative disorders characterized by a qualitatively different kind of dissociation? *Journal of Trauma & Dissociation.* 2010;12: 9-24.
153. Rodewald F, Gast U, Emrich HM. Screening for major dissociative disorders with the FDS, the German version of the Dissociative Experience Scale. *Psychother Psychosom Med Psychol.* 2006;56: 249-258.
154. Roelofs K, Keijsers GP, Hoogduin KA, Naring GW, Moene FC. Childhood abuse in patients with conversion disorder. *Am J Psychiatry.* 2002;159: 1908-1913.
155. Ross CA. Borderline personality disorder and dissociation. *Journal of Trauma & Dissociation.* 2007;8: 71-80.
156. Ross CA, Ellason JW, Anderson G. A factor analysis of the Dissociative Experiences Scale (DES) in dissociative identity disorder. *Dissociation: Progress in the Dissociative Disorders.* 1995;8: 229-235.
157. Ross CA, Heber S, Anderson G, Norton GR, Anderson BA, del Campo M, et al. Differentiating multiple personality disorder and complex partial seizures. *Gen Hosp Psychiatry.* 1989;11: 54-58.
158. Ross CA, Norton GR, Anderson G. The Dissociative Experiences Scale: a replication study. *Dissociation: Progress in the Dissociative Disorders.* 1988;Vol 1: 21-22.
159. Rufer M, Held D, Cremer J, Fricke S, Moritz S, Peter H, et al. Dissociation as a predictor of cognitive behavior therapy outcome in patients with obsessive-compulsive disorder. *Psychother Psychosom.* 2006;75: 40-46.

160. Russ MJ, Clark WC, Cross LW, Kemperman I, Kakuma T, Harrison K. Pain and self-injury in borderline patients: sensory decision theory, coping strategies, and locus of control. *Psychiatry Res.* 1996;63: 57-65.
161. Sar V, Islam S, Öztürk E. Childhood emotional abuse and dissociation in patients with conversion symptoms. *Psychiatry Clin Neurosci.* 2009;63: 670-677.
162. Sar V, Koyuncu A, Öztürk E, Yargic LI, Kundakci T, Yazici A, et al. Dissociative disorders in the psychiatric emergency ward. *Gen Hosp Psychiatry.* 2007a;29: 45-50.
163. Sar V, Kundakci T, Kiziltan E, Yargic LI, Tutkun H, Bakim B, et al. The Axis-I dissociative disorder comorbidity of borderline personality disorder among psychiatric outpatients. *Journal of Trauma & Dissociation.* 2003;4: 119-136.
164. Sar V, Taycan O, Bolat N, Ozmen M, Duran A, Öztürk E, et al. Childhood trauma and dissociation in schizophrenia. *Psychopathology.* 2010;43: 33-40.
165. Sar V, Unal SN, Öztürk E. Frontal and occipital perfusion changes in dissociative identity disorder. *Psychiatry Res.* 2007b;156: 217-223.
166. Sar V, Yargıç İ, Tutkun H. Structured interview data on 35 cases of dissociative identity disorder in Turkey. *Am J Psychiatry.* 1996;153: 1329-1333.
167. Savitz JB, van der Merwe L, Newman TK, Solms M, Stein DJ, Ramesar RS. The relationship between childhood abuse and dissociation. Is it influenced by catechol-O-methyltransferase (COMT) activity? *Int J Neuropsychopharmacol.* 2008;11: 149-161.
168. Schäfer I, Fisher HL, Aderhold V, Huber B, Hoffmann-Langer L, Golks D, et al. Dissociative symptoms in patients with schizophrenia: relationships with childhood trauma and psychotic symptoms. *Compr Psychiatry.* 2012;53: 364-371.
169. Schäfer I, Harfst T, Aderhold V, Briken P, Lehmann M, Moritz S, et al. Childhood trauma and dissociation in female patients with schizophrenia spectrum disorders: An exploratory study. *J Nerv Ment Dis.* 2006;194: 135-138.
170. Schäfer I, Langeland W, Hissbach J, Luedecke C, Ohlmeier MD, Chodzinski C, et al. Childhood trauma and dissociation in patients with alcohol dependence, drug dependence, or both — A multi-center study. *Drug Alcohol Depend.* 2010;109: 84-89.
171. Schäfer I, Reininghaus U, Langeland W, Voss A, Zieger N, Haasen C, et al. Dissociative symptoms in alcohol-dependent patients: associations with childhood trauma and substance abuse characteristics. *Compr Psychiatry.* 2007;48: 539-545.
172. Schroeder K, Langeland W, Fisher HL, Huber CG, Schäfer I. Dissociation in patients with schizophrenia spectrum disorders: What is the role of different types of childhood adversity? *Compr Psychiatry.* 2016;68: 201-208.
173. Scropo JC, Drob SL, Weinberger JL, Eagle P. Identifying dissociative identity disorder: a self-report and projective study. *J Abnorm Psychol.* 1998;107: 272-284.
174. Selvi Y, Besiroglu L, Aydin A, Gulec M, Atli A, Boysan M, et al. Relations between childhood traumatic experiences, dissociation, and cognitive models in obsessive compulsive disorder. *Int J Psychiatry Clin Pract.* 2012;16: 53-59.

175. Semiz ÜB, Başoğlu C, Ebrinç S, Çetin M. Nightmare disorder, dream anxiety, and subjective sleep quality in patients with borderline personality disorder. *Psychiatry Clin Neurosci*. 2008;62: 48-55.
176. Semiz ÜB, Başoğlu C, Ebrinç S, Ergün BM, Noyan CO, Çetin M. Sinir kişilik bozukluğu hastalarında vücut dismorfik bozukluğu, travma ve disosiyasyon: Bir önçalışma. = Body dysmorphic disorder, trauma, and dissociation in patients with borderline personality disorder: a preliminary study. *Bulletin of Clinical Psychopharmacology*. 2005;15: 65-70.
177. Shearer SL. Dissociative phenomena in women with borderline personality disorder. *Am J Psychiatry*. 1994;151: 1324-1328.
178. Simeon D. The role of childhood interpersonal trauma in depersonalization disorder. *Am J Psychiatry*. 2001b;158: 1027-1033.
179. Simeon D. Personality factors associated with dissociation: temperament, defenses, and cognitive schemata. *Am J Psychiatry*. 2002;159: 489-491.
180. Simeon D, Gross S, Guralnik O, Stein DJ, Schmeidler J, Hollander E. Feeling unreal: 30 cases of DSM-III-R depersonalization disorder. *Am J Psychiatry*. 1997;154: 1107-1113.
181. Simeon D, Guralnik O, Gross S, Stein DJ, Schmeidler J, Hollander E. The detection and measurement of depersonalization disorder. *J Nerv Ment Dis*. 1998;186: 536-542.
182. Simeon D, Guralnik O, Knutelska M, Nelson D. Dissection of schizotypy and dissociation in depersonalization disorder. *Journal of Trauma & Dissociation*. 2004;5: 111-119.
183. Simeon D, Guralnik O, Schmeidler J. Development of a depersonalization severity scale. *J Trauma Stress*. 2001a;14: 341-349.
184. Simeon D, Hwu R, Knutelska M. Temporal disintegration in depersonalization disorder. *Journal of Trauma & Dissociation*. 2007;8: 11-24.
185. Simeon D, Knutelska M, Nelson D, Guralnik O. Feeling unreal: a depersonalization disorder update of 117 cases. *J Clin Psychiatry*. 2003b;64: 990-997.
186. Simeon D, Knutelska M, Nelson D, Guralnik O, Schmeidler J. Examination of the pathological dissociation taxon in depersonalization disorder. *J Nerv Ment Dis*. 2003a;191: 738-744.
187. Simeon D, Nelson D, Elias R, Greenberg J, Hollander E. Relationship of personality to dissociation and childhood trauma in borderline personality disorder. *Cns Spectrums*. 2003c;8: 755-762.
188. Simeon D, Smith RJ, Knutelska M, Smith LM. Somatoform dissociation in depersonalization disorder. *Journal of Trauma & Dissociation*. 2008;9: 335-348.
189. Sno HN, Schalken HFA, Op den Velde W, Aarts PG. Dissociatieve verschijnselen bij patiënten op een polikliniek psychiatrie. = Dissociative symptoms in psychiatric outpatients. *Tijdschrift voor Psychiatrie*. 2002;44: 161-172.
190. Somer E, Avni R. Dissociative phenomena among recovering heroin users and their relationship to duration of abstinence. *Journal of Social Work Practice in the Addictions*. 2003;3: 25-38.

191. Spitzer C, Haug H-J, Freyberger HJ. Dissociative symptoms in schizophrenic patients with positive and negative symptoms. *Psychopathology*. 1997;30: 67-75.
192. Spitzer C, Spelsberg B, Grabe H-J, Mundt B, Freyberger HJ. Dissociative experiences and psychopathology in conversion disorders. *J Psychosom Res*. 1999;46: 291-294.
193. Stadnik RD, Brand B, Savoca A. Personality assessment inventory profile and predictors of elevations among dissociative disorder patients. *Journal of Trauma & Dissociation*. 2013;14: 546-561.
194. Steinberg M, Rounsaville B, Cicchetti D. Detection of dissociative disorders in psychiatric patients by a screening instrument and a structured diagnostic interview. *Am J Psychiatry*. 1991;148: 1050-1054.
195. Sugiura M, Hirosawa M, Tanaka S, Nishi Y, Yamada Y, Mizuno M. Reliability and validity of a Japanese version of the Cambridge depersonalization scale as a screening instrument for depersonalization disorder. *Psychiatry Clin Neurosci*. 2009;63: 314-321.
196. Tamar-Gurol D, Sar V, Karadag F, Evren C, Karagoz M. Childhood emotional abuse, dissociation, and suicidality among patients with drug dependency in Turkey. *Psychiatry Clin Neurosci*. 2008;62: 540-547.
197. Taner E, Açıkürek K, Coşar B, Arıkan Z. Yytarak tedavi gören alkol bağımlılığı olan erkek hastalarda disosiyatif bozukluk. (Turkish). *Journal of Dependence*. 2007;8: 24-28.
198. Tapia G, Clarys D, Bugajska A, El-Hage W. Recollection of negative information in posttraumatic stress disorder. *J Trauma Stress*. 2012;25: 120-123.
199. Tapia G, Clarys D, El Hage W, Belzung C, Isingrini M. PTSD psychiatric patients exhibit a deficit in remembering. *Memory*. 2007;15: 145-153.
200. Tezcan E, Atmaca M, Kuloglu M, Gecici O, Buyukbayram A, Tutkun H. Dissociative disorders in Turkish inpatients with conversion disorder. *Compr Psychiatry*. 2003;44: 324-330.
201. Turner KKA. Dissociation, trauma and impulsive behaviors: studies of parasuicidal behavior and binge eating. Dissertation, US: ProQuest Information & Learning. 1998.
202. Tutkun H, Yargic LI, Sar V. Dissociative identity disorder: a clinical investigation of 20 cases in Turkey. *Dissociation: Progress in the Dissociative Disorders*. 1995;8: 3-9.
203. Vuchelen S, Vanderlinden J, Vandereycken W, Pieters G. Trauma en dissociatie bij borderline-persoonlijkheidsstoornissen. = Trauma and dissociation in borderline personality disorder. *Tijdschrift voor Psychiatrie*. 1996;38: 123-134.
204. Vyskocilova J, Prasko J, Sipek J. Cognitive behavioral therapy in pharmacoresistant obsessive-compulsive disorder. *Neuropsychiatr Dis Treat*. 2016;12: 625-639.
205. Waller G, Babbs M, Wright F, Potterton C, Meyer C, Leung N. Somatoform dissociation in eating-disordered patients. *Behav Res Ther*. 2003;41: 619-627.
206. Waller G, Ohanian V, Meyer C, Everill J, Rouse H. The utility of dimensional and categorical approaches to understanding dissociation in the eating disorders. *Br J Clin Psychol*. 2001;40: 387-397.

207. Wassink ML. Multiple personality disorder and major depression: A comparative study. Dissertation, US: ProQuest Information & Learning. 1996.
208. Webb LM. Clinical assessment of malingering utilizing the Minnesota Multiphasic Personality Inventory II (MMPI-II), Millon Clinical Multiaxial Inventory III (MCMI-III) and Dissociative Experience Scale (DES). Dissertation, US: ProQuest Information & Learning. 1998.
209. Welburn KR, Fraser GA, Jordan SA, Cameron C, Webb LM, Raine D. Discriminating dissociative identity disorder from schizophrenia and feigned dissociation and psychological tests and structured interview. *Journal of Trauma & Dissociation*. 2003;4: 109-130.
210. Wenzel K, Bernstein DP, Handelsman L, Rinaldi P, Ruggiero J, Higgins B. Levels of dissociation in detoxified substance abusers and their relationship to chronicity of alcohol and drug use. *J Nerv Ment Dis*. 1996;184: 220-227.
211. Yargic LI, Sar V, Tutkun H, Alyanak B. Comparison of dissociative identity disorder with other diagnostic groups using a structured interview in Turkey. *Compr Psychiatry*. 1998;39: 345-351.
212. Yılmaz O, Ateş MA, Semiz ÜB, Tütüncü R, Bez Y, Algül A, et al. Childhood traumas in patients with bipolar disorder: Association with alexithymia and dissociative experiences. *Anatolian Journal of Psychiatry*. 2016;17: 188-195.
213. Zonarini MC, Ruser T, Frankenburg FR, Hennen J. The dissociative experiences of borderline patients. *Compr Psychiatry*. 2000;41: 223-227.
214. Zucker M, Spinazzola J, Blaustein M, van der Kolk BA. Dissociative symptomatology in posttraumatic stress disorder and disorders of extreme stress. *Journal of Trauma & Dissociation*. 2006;7: 19-31.
215. Zweig-Frank H. Dissociation in male patients with borderline and non-borderline personality disorders. *Journal of Personality Disorders*. 1994a;8: 210-218.
216. Zweig-Frank H. Dissociation in female patients with borderline and non-borderline personality disorders. *Journal of Personality Disorders*. 1994b;8: 203-209.
